# Supplementary material for: Who Matters the Most? The Differential Role of Parents, Teachers, and Peers’ Supportive Relationships in Early Adolescents’ Subjective Well-Being
Source: Springer Nature journal article supplement (doi:10.1007/s10902-024-00856-2), 2025-02-01
Supplement: MOESM1 [file 10902_2024_856_MOESM1_ESM.docx]

**Supplementary Material. S1**

A detailed description of the measures collected in Wave Three of the Children’s Worlds International Survey, and used in the present study, is provided as follows:

The Children’s Worlds Subjective Well-Being Scale adapted from the Student Life Satisfaction Scale (SLSS, Huebner, 1991) contained the following items:

1. I enjoy my life
2. My life is going well
3. I have a good life
4. The things that happen in my life are excellent
5. I like my life
6. I am happy with my life

Domain-based subjective well-being was adapted from the Brief Multidimensional Students' Life Satisfaction Scale (BMSLSS; Seligson, Huebner, & Valois, 2003) and the Personal Well-being Index – School Children (PWI-SC, Cummins & Lau, 2005), included the following items:

For the assessment of domain-based well-being in our study, 9 items were used as below:

1. Satisfaction with: How safe you feel
2. Satisfaction with: The freedom you have
3. Satisfaction with: What may happen to you later in your life
4. Satisfaction with: Your health
5. Satisfaction with: How you use your time
6. Satisfaction with: How much free time you have
7. Satisfaction with: All the things you have
8. Satisfaction with: The way that you look
9. Satisfaction with: How you are listened to by others in general

The following two items were used to separately assess “Satisfaction with School” as a crucial life-domain for early adolescents.

1. Satisfaction with: Your life as a student
2. Satisfaction with: Things you have learned

Items 12-15 were not considered to avoid conceptual overlap with predictor variables which include supportive relationships with significant others. Items 16 and 17 were also not included as they represent satisfaction with external environmental factors, which are fundamentally different in scope and nature from the other items, which focus on individual and social aspects of subjective well-being.

1. Satisfaction with: Your classmates
2. Satisfaction with: Your friends
3. Satisfaction with: Other people in your family
4. Satisfaction with: The people you live with
5. Satisfaction with: The area where you live
6. Satisfaction with: The house or flat where you live

The Children’s Worlds Positive and Negative Affect Scale (CW-PNAS) contained three items referring to positive and negative experiences respectively.

1. Last two weeks: How often feeling happy
2. Last two weeks: How often feeling calm
3. Last two weeks: How often feeling full of energy
4. Last two weeks: How often feeling sad
5. Last two weeks: How often feeling stressed
6. Last two weeks: How often feeling bored

*Supportive relationships with parents / caregivers*

1. There are people in my family who care about me
2. If I have a problem, people in my family will help me
3. We have a good time together in my family
4. My parents/carers listen to me and take what I say into account
5. My parents and I make decisions about my life together
6. I feel safe at home

*Supportive relationships with teachers*

1. My teachers care about me
2. If I have a problem at school my teachers will help me
3. My teachers listen to me and take what I say into account
4. At school I have opportunities to make decisions about things that are important to me
5. I feel safe at school

*Supportive relationships with peers*

1. I have enough friends
2. My friends are usually nice to me
3. Me and my friends get along well together
4. If I have a problem, I have a friend who will support me
5. If I have a problem at school classmates will help me
6. Satisfaction with: Your classmates
