# Supplementary material for: Who Matters the Most? The Differential Role of Parents, Teachers, and Peers’ Supportive Relationships in Early Adolescents’ Subjective Well-Being
Source: Springer Nature journal article supplement (doi:10.1007/s10902-024-00856-2), 2025-02-01
Supplement: MOESM2 [file 10902_2024_856_MOESM2_ESM.docx]

**Supplementary Material. S2**

Supplementary SEM analyses were performed with 5 well-being outcome variables (1. global life satisfaction, 2. domain-based life satisfaction, 3. satisfaction with school, 4. positive affect, and 5. negative affect) were regressed on the independent variables (i.e., parental support, teacher support, peer support). The specified SEM achieved an adequate fit: AIC = 241282.094, BIC = 242145.716, χ2(710) = 1559.43, *p* < .001, RMSEA = 0.023 (90% CI [0.021 0.024]), CFI = 0.917, TLI = 0.909, SRMR = 0.038.

Positive correlations were found between predictor variables: support from parents was positively associated with support from teachers (*r* = 0.63, *p* < 0.0001) and peers *(r* = 0.61*, p* < 0.0001). Additionally, peer and teacher support were positively associated (*r* = 0.72, *p* < 0.0001). Positive correlations were also found between dependent variables: global life satisfaction was positively associated with domain-based life satisfaction (*r* = 0.60, *p* < 0.0001), satisfaction with school (*r* = 0.28, *p* < 0.0001) and positive affect (*r* = 0.58, *p* < 0.0001). Likewise, positive affect was significantly associated with satisfaction with school (*r* = 0.38, *p* < 0.0001) and domain-based satisfaction with life (*r* = 0.70*, p* < 0.0001) and a trend to significance was found for negative affect (*r* = 0.08, *p* = 0.057). Negative affect on the other hand, was significantly correlated with school satisfaction (*r* = 0.13, *p* = 0.003), and domain-based well-being (*r* = 0.12, *p* = 0.004), but not with global satisfaction with life (*r* = 0.07, *p* = 0.071). Regression paths from parental support were significantly related to global cognitive well-being (*β* = 0.12, *p* = 0.029). All other paths did not reach significance levels. The path from teacher support to satisfaction with school was significant (*β* = 0.40, *p* < 0.001), showing that the more supported students felt by teachers, the higher their reported satisfaction with school. Lastly, significant relations were found between peer support and almost all well-being variables in our dataset: global life satisfaction (*β* = 0. 24, *p* < 0.001); domain-based life satisfaction (*β* = 0.41, *p* < 0.001), and positive (*β* = 0.33, *p* < 0.001) and negative affect (*β* = 0.17, *p* = 0.022). A trend to significance was evidenced in the path from peer support to satisfaction with school (*β* = 0.16, *p* = 0.058). That is, students who feel supported by their friends and classmates also report high values of satisfaction with life either globally perceived or based on specific domains, including satisfaction with school and affective well-being.
